# Supplementary material for: Bilayer TiO2photoanode consisting of a nanowire–nanoparticle bottom layer and a spherical voids scattering layer for dye-sensitized solar cells
Source: Royal Society of Chemistry journal article supplement (doi:10.1039/c5nj00216h), 2015-01-01
Supplement: c5nj00216h1.pdf [file c5nj00216h1.pdf]

## Electronic Supplementary Information

for *New Journal of Chemistry*

### Bilayer TiO<sub>2</sub> photoanode consisting of nanowire-nanoparticle bottom layer and spherical voids scattering layer for dye-sensitized solar cells

Panpan Sun,<sup>a, b</sup> Xintong Zhang,<sup>\*a</sup> Lingling Wang,<sup>a</sup> Fangchao Li,<sup>a</sup> Yongan Wei,<sup>a</sup> Changhua Wang,<sup>a</sup> Yichun Liu<sup>a</sup>

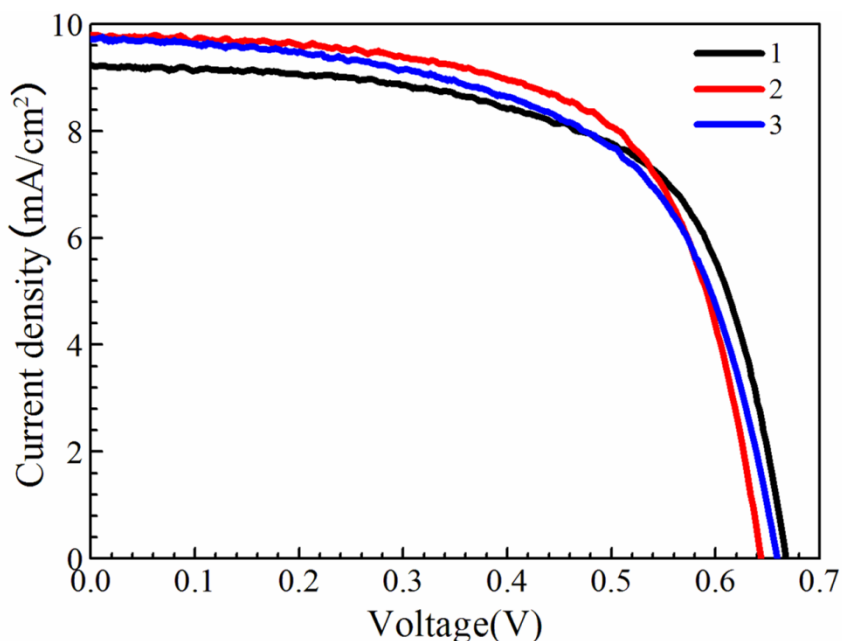

Fig. S1. J-V characteristics of three DSSCs based on TiO<sub>2</sub> NW-NP/SVL-30min photoanode under AM 1.5G solar simulator illumination.

Table 1 Photovoltaic parameters of three DSSCs based on TiO<sub>2</sub> NW-NP/SVL-30min photoanode under AM 1.5G solar simulator illumination.

| Sample  | V <sub>oc</sub> /mV | J <sub>sc</sub> /mA cm <sup>-2</sup> | FF/% | η/%  |
|---------|---------------------|--------------------------------------|------|------|
| 1       | 667                 | 9.22                                 | 63.9 | 3.94 |
| 2       | 644                 | 9.79                                 | 64.5 | 4.07 |
| 3       | 659                 | 9.72                                 | 60.6 | 3.87 |
| Average | 657                 | 9.58                                 | 63.0 | 3.96 |
